# Supplementary material
Source: PubMed Central journal article supplement (PMC1691393)
Supplement: 12965011s01.pdf [file 12965011s01.pdf]

This is an electronic appendix to the paper by Jenny & Kéry 2003 Timing of autumn bird migration under climate change: advances in long-distance migrants, delays in short-distance migrants. *Proc. R. Soc. Lond. B* **270**, 1467--1471. (DOI 10.1098/rspb.2003.2394.)

Electronic appendices are refereed with the text. However, no attempt is made to impose a uniform editorial style on the electronic appendices.

**Electronic appendix A.** List of 65 bird taxa (64 species and one distinct subspecies) studied at Col de Bretolet. For each period, the estimated peak passage (in Julian days) and the s.e. of that estimate are given. For each taxon, *n* is the total number of captures over the three periods that entered the analysis. \* = no data available.

| Species                           | <i>n</i> | Period 1     |      | Period 2     |      | Period 3     |      |
|-----------------------------------|----------|--------------|------|--------------|------|--------------|------|
|                                   |          | Peak passage | s.e. | Peak passage | s.e. | Peak passage | s.e. |
| <i>Coturnix coturnix</i>          | 138      | 261.6        | 13.6 | 254.4        | 16.9 | 251.4        | 13.6 |
| <i>Apus melba</i>                 | 23       | 219.6        | 11.3 | 214.7        | 12.1 | *            | *    |
| <i>Apus apus</i>                  | 83       | 214.5        | 7.3  | 213.4        | 4.1  | 214.1        | 6.1  |
| <i>Jynx torquilla</i>             | 165      | 236.9        | 8.5  | 245.5        | 5.0  | 230.8        | 13.8 |
| <i>Lullula arborea</i>            | 128      | 284.9        | 5.9  | 288.0        | 6.4  | 283.1        | 4.2  |
| <i>Alauda arvensis</i>            | 844      | 288.4        | 3.6  | 301.8        | 10.6 | 295.1        | 6.6  |
| <i>Hirundo rustica</i>            | 2020     | 262.4        | 2.4  | 266.6        | 1.0  | 260.5        | 5.9  |
| <i>Delichon urbica</i>            | 3527     | 258.7        | 1.7  | 260.1        | 0.8  | 260.5        | 2.1  |
| <i>Riparia riparia</i>            | 114      | 261.6        | 5.5  | 262.4        | 5.1  | 257.9        | 7.1  |
| <i>Garrulus glandarius</i>        | 287      | 273.4        | 3.2  | 275.6        | 2.8  | 262.4        | 16.0 |
| <i>Parus major</i>                | 10154    | 281.3        | 0.5  | 284.1        | 0.4  | 286.9        | 4.1  |
| <i>Parus caeruleus</i>            | 13372    | 272.5        | 0.5  | 277.9        | 0.7  | 288.5        | 1.8  |
| <i>Parus ater</i>                 | 33864    | 265.0        | 0.8  | 268.9        | 0.6  | 260.4        | 0.7  |
| <i>Aegithalos caudatus</i>        | 295      | 284.4        | 4.9  | 288.3        | 5.1  | 287.4        | 4.7  |
| <i>Sitta europaea</i>             | 181      | 268.7        | 12.6 | 271.5        | 16.0 | 258.4        | 10.7 |
| <i>Troglodytes troglodytes</i>    | 215      | 267.5        | 12.9 | 266.1        | 7.9  | 270.7        | 6.7  |
| <i>Erithacus rubecula</i>         | 23618    | 271.9        | 1.0  | 271.3        | 1.0  | 269.5        | 0.7  |
| <i>Luscinia megarhynchos</i>      | 131      | 232.1        | 19.0 | 232.4        | 10.0 | 229.7        | 7.4  |
| <i>Phoenicurus ochruros</i>       | 910      | 274.5        | 5.6  | 277.2        | 5.2  | 284.5        | 8.0  |
| <i>Phoenicurus phoenicurus</i>    | 3196     | 250.1        | 2.5  | 250.8        | 2.5  | 247.9        | 3.2  |
| <i>Saxicola rubetra</i>           | 1258     | 240.2        | 3.5  | 234.4        | 3.1  | 237.0        | 4.6  |
| <i>Oenanthe oenanthe</i>          | 2274     | 253.1        | 1.9  | 248.8        | 2.5  | 255.0        | 3.4  |
| <i>Turdus torquatus torquatus</i> | 111      | 263.3        | 13.4 | 274.3        | 6.5  | 277.6        | 13.2 |
| <i>Turdus torquatus alpestris</i> | 1263     | 254.2        | 11.4 | 256.2        | 5.5  | 256.2        | 5.2  |
| <i>Turdus merula</i>              | 1443     | 276.3        | 2.4  | 281.4        | 2.4  | 282.4        | 2.5  |
| <i>Turdus iliacus</i>             | 218      | 289.4        | 3.2  | 314.8        | 53.0 | 297.6        | 12.9 |
| <i>Turdus philomelos</i>          | 4400     | 275.6        | 1.9  | 277.0        | 1.9  | 276.9        | 2.2  |
| <i>Turdus viscivorus</i>          | 371      | 274.5        | 3.7  | 280.4        | 6.9  | 280.0        | 6.4  |
| <i>Locustella naevia</i>          | 73       | *            | *    | 231.0        | 10.8 | 236.7        | 14.5 |
| <i>Acrocephalus scirpaceus</i>    | 390      | 252.0        | 13.1 | 249.7        | 8.0  | 250.8        | 7.4  |

|                                      |        |       |      |       |      |       |      |
|--------------------------------------|--------|-------|------|-------|------|-------|------|
| <i>Hippolais icterina</i>            | 245    | 238.0 | 7.6  | 229.6 | 6.2  | 235.1 | 6.8  |
| <i>Sylvia atricapilla</i>            | 847    | 266.6 | 19.0 | 260.5 | 12.8 | 263.0 | 4.6  |
| <i>Sylvia borin</i>                  | 1814   | 245.1 | 4.2  | 244.0 | 2.5  | 239.0 | 3.2  |
| <i>Sylvia communis</i>               | 409    | 235.5 | 5.1  | 236.3 | 5.6  | 241.2 | 7.0  |
| <i>Phylloscopus trochilus</i>        | 5421   | 239.0 | 2.3  | 232.2 | 1.8  | 233.9 | 1.3  |
| <i>Phylloscopus collybita</i>        | 1739   | 277.9 | 2.4  | 277.2 | 1.8  | 277.8 | 2.0  |
| <i>Phylloscopus sibilatrix</i>       | 57     | 225.7 | 16.2 | 228.3 | 14.9 | 224.1 | 13.7 |
| <i>Regulus regulus</i>               | 2595   | 313.4 | 59.5 | 304.0 | 29.6 | 290.4 | 7.9  |
| <i>Regulus ignicapillus</i>          | 797    | 260.6 | 5.7  | 259.8 | 4.6  | 257.2 | 3.4  |
| <i>Muscicapa striata</i>             | 594    | 248.3 | 5.6  | 247.0 | 4.9  | 243.4 | 5.5  |
| <i>Ficedula hypoleuca</i>            | 7411   | 244.7 | 1.6  | 239.3 | 1.2  | 238.6 | 1.0  |
| <i>Prunella modularis</i>            | 8516   | 271.8 | 2.3  | 270.8 | 1.1  | 264.8 | 1.2  |
| <i>Anthus pratensis</i>              | 2468   | 285.1 | 1.6  | 286.3 | 1.9  | 288.0 | 1.6  |
| <i>Anthus campestris</i>             | 65     | 250.1 | 8.7  | 250.7 | 16.0 | 248.9 | 19.1 |
| <i>Anthus trivialis</i>              | 8757   | 240.5 | 1.1  | 241.2 | 0.9  | 242.0 | 1.2  |
| <i>Motacilla alba</i>                | 1529   | 285.8 | 2.4  | 283.5 | 1.2  | 286.4 | 1.9  |
| <i>Motacilla cinerea</i>             | 289    | 260.1 | 7.7  | 265.0 | 5.4  | 262.2 | 10.1 |
| <i>Motacilla flava</i>               | 4750   | 254.4 | 1.4  | 252.4 | 1.3  | 250.8 | 1.2  |
| <i>Lanius collurio</i>               | 107    | 243.1 | 14.3 | 238.2 | 12.8 | 231.6 | 10.4 |
| <i>Sturnus vulgaris</i>              | 883    | 281.8 | 3.7  | 297.9 | 14.1 | 290.6 | 3.6  |
| <i>Passer domesticus</i>             | 149    | 281.9 | 4.8  | 283.7 | 5.0  | *     | *    |
| <i>Passer montanus</i>               | 158    | 280.0 | 5.5  | 286.1 | 2.2  | *     | *    |
| <i>Coccothraustes coccothraustes</i> | 383    | 275.8 | 4.2  | 284.6 | 3.2  | 282.7 | 3.5  |
| <i>Carduelis chloris</i>             | 978    | 288.7 | 2.2  | 293.4 | 6.5  | 295.2 | 3.6  |
| <i>Carduelis carduelis</i>           | 4614   | 279.9 | 1.9  | 281.7 | 3.2  | 300.7 | 19.1 |
| <i>Carduelis spinus</i>              | 26891  | 286.8 | 0.8  | 304.3 | 4.3  | 294.9 | 2.0  |
| <i>Carduelis cannabina</i>           | 5255   | 286.1 | 1.1  | 285.5 | 0.9  | 289.0 | 1.9  |
| <i>Serinus citrinella</i>            | 5242   | 283.9 | 1.2  | 282.4 | 1.3  | 296.7 | 4.9  |
| <i>Serinus serinus</i>               | 4988   | 287.9 | 1.4  | 286.2 | 0.9  | 290.0 | 1.1  |
| <i>Pyrrhula pyrrhula</i>             | 367    | 284.2 | 4.2  | 288.1 | 11.8 | 300.7 | 36.2 |
| <i>Fringilla coelebs</i>             | 133315 | 280.4 | 0.2  | 281.9 | 0.2  | 283.1 | 0.3  |
| <i>Fringilla montifringilla</i>      | 6803   | 287.3 | 0.7  | 292.4 | 1.6  | 299.8 | 3.6  |
| <i>Emberiza hortulana</i>            | 475    | 245.7 | 3.6  | 244.8 | 3.3  | 243.3 | 4.7  |
| <i>Emberiza cia</i>                  | 148    | 292.4 | 5.9  | 293.7 | 11.2 | 292.1 | 6.6  |
| <i>Emberiza schoeniclus</i>          | 371    | 298.8 | 16.6 | 286.1 | 2.8  | 288.0 | 2.1  |
